# Supplementary material for: Long circulating anionic liposomes for hepatic targeted delivery of cisplatin
Source: Royal Society of Chemistry journal article supplement (doi:10.1039/c6ra08566k), 2016-01-01
Supplement: c6ra08566k1.pdf [file c6ra08566k1.pdf]

## SUPPORTING INFORMATION

### Long Circulating Anionic Liposome for Hepatic Targeted Delivery of Cisplatin

Liuji Zhang, Ying Kuang, Jia Liu, Zhilan Liu\*, Shiwen Huang\* and Renxi Zhuo

#### Characterization of GA derivatives

**Fig. 1** shows the FTIR spectra of GA, AGA-PEG and AGA-PEG-ST. In the spectra of GA, the absorption peaks at 3450 cm<sup>-1</sup>, 2947 cm<sup>-1</sup> and 1650 cm<sup>-1</sup> are associated with hydroxyl bonds and alkene bonds of GA, respectively. The broad peak appearing between 3400 and 2500 cm<sup>-1</sup> and the peak at 1720 cm<sup>-1</sup> are respectively contributed to O-H bonds and carbonyl bonds in carboxylic acid. In the spectra of AGA-PEG and AGA-PEG-ST, the absorption peaks appearing at 1113 cm<sup>-1</sup> are contributed to C-O-C in PEG, the peaks at 1735 cm<sup>-1</sup> indicates generation of ester bond.

The <sup>1</sup>H NMR spectra of MPEG-STA is shown in Fig. 2. In the spectra,  $\delta$  in ppm 3.243 (t, 2H, CH<sub>2</sub>), 0.896 (s, 3H, CH<sub>3</sub>) and 1.269 (s, 30H, 15CH<sub>2</sub>) are contributed to STA segment b, c, d respectively.  $\delta$  in ppm 3.441 (m, 2H, CH<sub>2</sub>), 3.441-3.762 (m, PEG), 1.832 (s, 3H, OCH<sub>3</sub>) belong to MPEG. The signals at  $\delta$  (ppm) = 4.239 (t, 2H, CH<sub>2</sub>, a) suggested the formation of ester bond between MPEG and STA.

The <sup>1</sup>H NMR spectra of GA derivatives are shown in Fig. 3.  $\delta$  in ppm 5.710 (s, 1H, C=CH), 3.243 (t, 1H, CH), 2.350 (s, 2H, CH<sub>2</sub>), 2.072 (t, 1H, CH), 1.832 (t, 1H, CH) belong respectively to GA segment f, a, b, e, c, d.  $\delta$  in ppm 3.441-3.765 (m, PEG).  $\delta$  in ppm 1.253 (s, 30H, 15CH<sub>2</sub>) belong to ST. The signals at 4.209-4.240 (t, 2H, COCH<sub>2</sub>) suggested the formation of ester bond. To sum up, AGA-PEG-ST was successfully synthesized.

All these results indicated that the co-polymers were successfully fabricated.

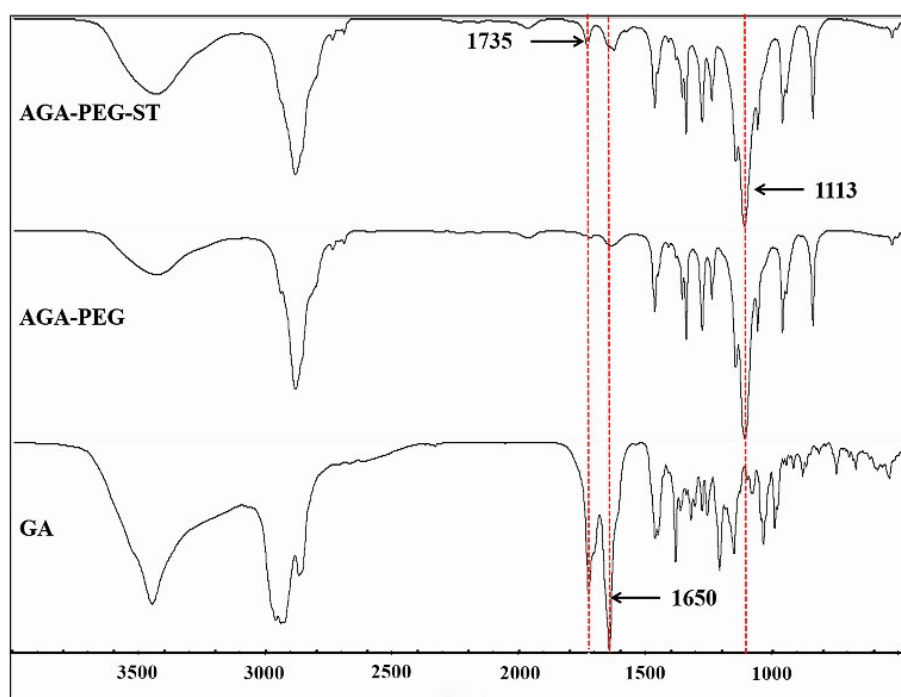

**Fig. 1** FTIR spectra. (A) GA; (B) AGA-PEG; (C) AGA-PEG-ST.

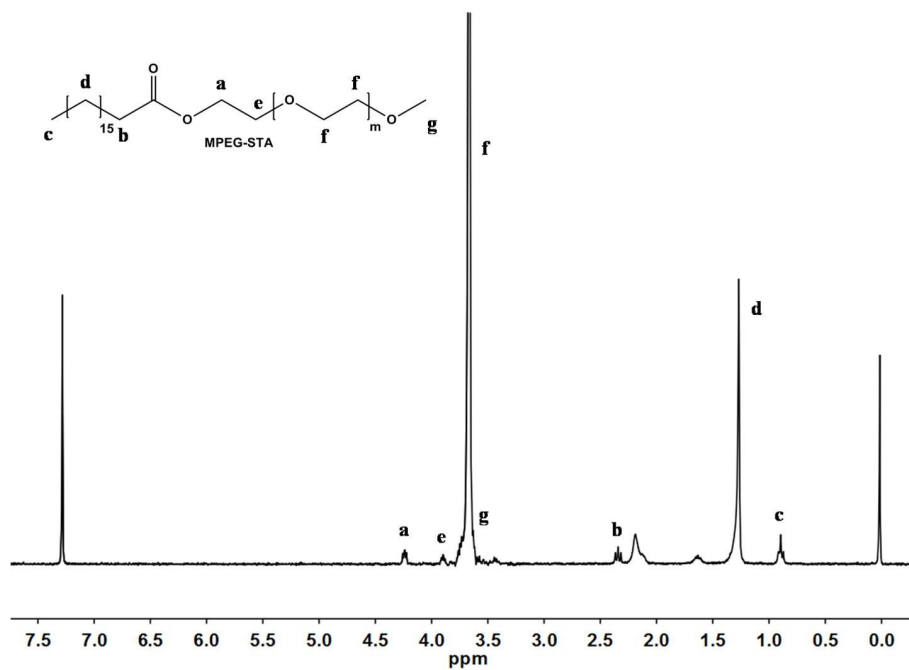

**Fig. 2** <sup>1</sup>H NMR spectra of MPEG-STA.

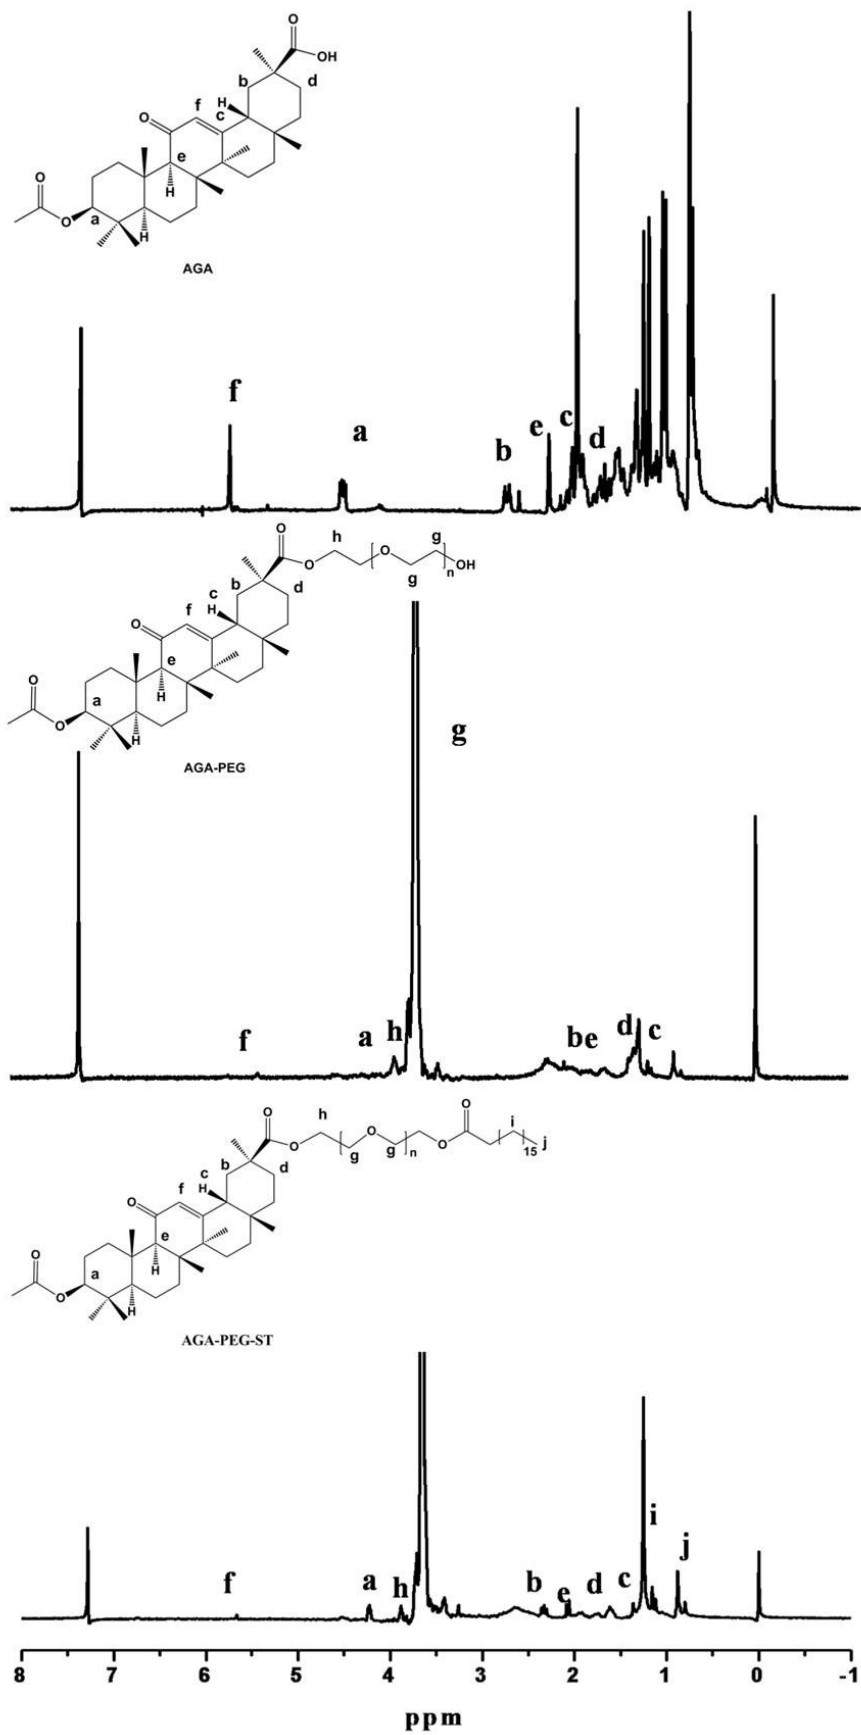

Fig. 3 <sup>1</sup>H NMR spectra. GA , AGA-PEG and AGA-PEG-ST in CDCl<sub>3</sub>.
